# Supplementary figures and images for: Smoking influences outcome in patients who had thrombolysed ischaemic stroke: the ENCHANTED study
Source: PubMed Central journal article supplement — Stroke Vasc Neurol. 2021 Feb 1;6(3):395–401. doi: 10.1136/svn-2020-000493 (PMC8485230; doi:10.1136/svn-2020-000493), 2021-02-01

## Standardized Mean Differences

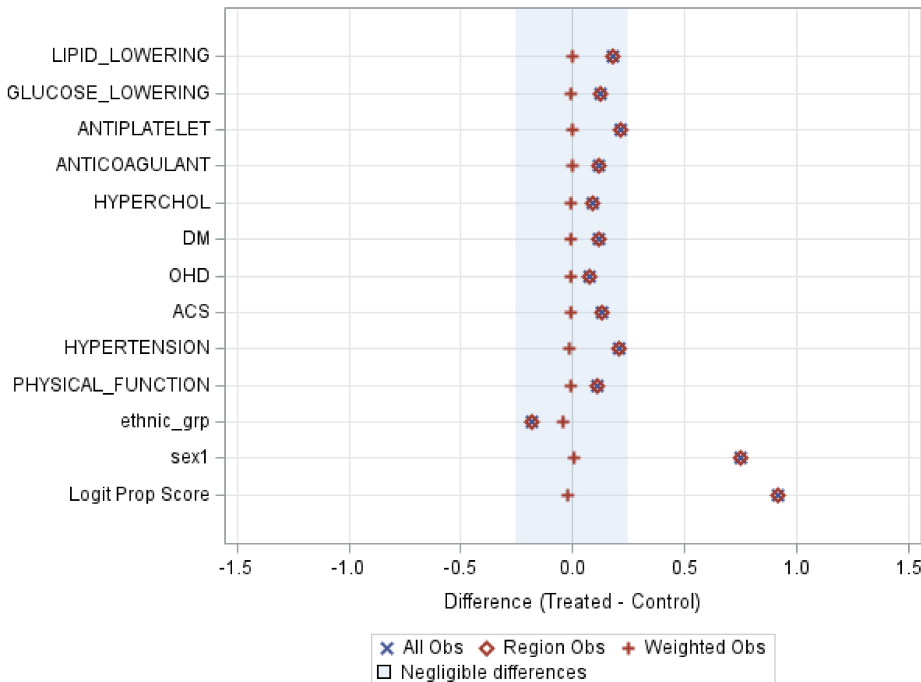

Supplement: svn-2020-000493supp001.pdf [file svn-2020-000493supp001.pdf]

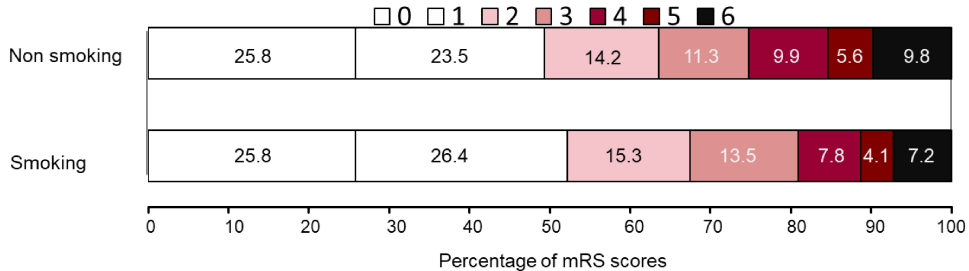

Crude OR(95%CI) 0.88 (0.77-0.99)

Adjusted OR(95%CI) 1.15 (1.04-1.28)

Supplement: svn-2020-000493supp002.pdf [file svn-2020-000493supp002.pdf]
